# Supplementary material for: Global geologic carbon storage requirements of climate change mitigation scenarios
Source: Royal Society of Chemistry journal article supplement (doi:10.1039/d0ee00674b), 2020-01-01
Supplement: d0ee00674b1.xlsx [file d0ee00674b1.xlsx]

## Sheet: Fig1_data_w_refs
Field/Aqifer	Total estimated pore volume (km^3)	Type of analysis (open, closed, or dynamic/sim)										Reference	Notes									estimates assumming the following number of townships
		open	open	open	closed	sim	sim	sim				Winkler, M., Abernethy, R., Nicolo, M., Huang, H., Wang, A., Zhang, S., … Hugonet, V. (2010). The dynamic aspect of formation storage use for CO2 sequestration. Society of Petroleum Engineers - SPE International Conference on CO2 Capture, Storage, and Utilization 2010, (March 2009), 695–706.					m^2	m^3 pv	kg CO2			100
BasalCambrianShell low	47.8321	322	670	1016	130	35	130	670					Quest reservoir, calculations in table to right				93240000	478321200	6696496800	6.6965	open mid	669.65
																	93240000	726339600	10168754400	10.1688	open high	1016.88
		sim	sim	sim	sim	sim	sim	sim	sim	sim	sim	Williams, J. D. O., Jin, M., Bentham, M., Pickup, G. E., Hannis, S. D., & Mackay, E. J. (2013). Modelling carbon dioxide storage within closed structures in the UK Bunter Sandstone Formation. International Journal of Greenhouse Gas Control, 18, 38–50. https://doi.org/10.1016/j.ijggc.2013.06.015					93240000	2.29743e+08	3.21641e+09	3.21641	open low	321.641
Bunter (Williams 2013)	280	331	426	328	344	297	303	484	501	318	237	10.1016/j.ijggc.2013.06.015								1.3	closed	130
																				0.35	sim low	35
		open										Holloway, S., Vincent, C. J., Bentham, M. S., & Kirk, K. L. (2006). Top-down and bottom-up estimates of CO2 storage capacity in the United Kingdom sector of the southern North Sea basin. Environmental Geosciences, 13(2), 71–84. https://doi.org/10.1306/eg.11080505015
Leman SS (Holloway)	435	3100										10.1306/eg.11080505015
Bunter SS (Holloway)	1396	14200
Utsira	600	1200
		sim	sim	sim	open (calculated from Norwegian Atlas storage eff of 4%)							Elenius, M., Skurtveit, E., Yarushina, V., Baig, I., Sundal, A., Wangen, M., … Gasda, S. E. (2018). Assessment of CO2 storage capacity based on sparse data: Skade Formation. International Journal of Greenhouse Gas Control, 79(September), 252–271. https://doi.org/10.1016/j.ijggc.2018.09.004
Skade 1	650	500	2800	5000	11764.7							10.1016/j.ijggc.2018.09.004
Skade 2	590	230	1200	2300	5411.76
Utsira	1700	210	1300	2100	4941.18
		open	open	open	closed	closed	closed	low sim	median sim	high sim		Gorecki, C. D., Ayash, S. C., Liu, G., Braunberger, J. R., & Dotzenrod, N. W. (2015). A comparison of volumetric and dynamic CO2 storage resource and efficiency in deep saline formations. International Journal of Greenhouse Gas Control, 42, 213–225. https://doi.org/10.1016/j.ijggc.2015.07.018
UpperMinnelusa	174	4090	10043	21638	1351	1545	1876	742	1714.5	3774		10.1016/j.ijggc.2015.07.018	Sims from table 6 and 7
Qingshankou	1290	7362	45237	137895	3047	5291	7420	1402	3267	17625			Sims from table 6 and 7
		open	open	closed	sim							Thibeau, S., Bachu, S., Birkholzer, J., Holloway, S., Neele, F., & Zhou, Q. (2014). Using pressure and volumetric approaches to estimate CO2 storage capacity in deep saline aquifers. Energy Procedia, 63, 5294–5304. https://doi.org/10.1016/j.egypro.2014.11.560	Open aquifer estmates were not available so they are estimated assuming similar efficiency factor as Bunter
Bunter	350	4200		2230	16500
MtSimon	1620	11000	150000	13300	18100
BasalCambrian	3260	57000	193000	16200	25000
Rotliegend	70	840		330	60
	Total estimated pore volume (km^3)			pore volume estimated from gross thickness								Szulczewski, M. L., MacMinn, C. W., Herzog, H. J., & Juanes, R. (2012). Lifetime of carbon capture and storage as a climate-change mitigation technology. Proceedings of the National Academy of Sciences, 109(14), 5185–5189. https://doi.org/10.1073/pnas.1115347109
		open	open	open	open	closed	closed					10.1073/pnas.1115347109
A	3328	72000	55000	52000	95000	10000	17000					Goodman, A., Bromhal, G., Strazisar, B., Rodosta, T., Guthrie, W. F., Allen, D., & Guthrie, G. (2013). Comparison of methods for geologic storage of carbon dioxide in saline formations. International Journal of Greenhouse Gas Control, 18, 329–342. https://doi.org/10.1016/j.ijggc.2013.07.016
B	3324	63000	48000	46000	84000	88000	15000					10.1016/j.ijggc.2013.07.016
C	4156	56000	43000	41000	75000	18000	9000
D	2496	47000	36000	34000	63000	17000	6000
E	1496	20000	15000	15000	27000	9000	3000
F	1455	20000	15000	14000	26000	12000	2000
G	2033.28	21000	21000	15000	27000	7000	8000
H	748.8	14000	11000	10000	19000	14000	2000
I	499.2	8000	6000	6000	11000	5000	4000
J	8131.2	8000	8000	6000	11000	5000	5000
K	416	7000	5000	5000	9000	4000	3000
L	34.72	1000	400	400	1000	2000	100
M	49.8	1000	1000	1000	1000	2000	300

## Sheet: Fig1_data_sorted_by_type
			Open table									closed table								Dynamic/sim table
Ref	Field	Total estimated pore volume (km^3)							Ref	Field	Total estimated pore volume (km^3)						Ref	Field	Total estimated pore volume (km^3)
Winkler2010 SPE	BasalCambrianShell low	47.8	322	670	1016				Winkler2010 SPE	BasalCambrianShell low	47.8	130					Winkler2010 SPE	BasalCambrianShell low	47.8	35	130	670
Holloway2009	Leman SS	435	3100						Gorecki2015	UpperMinnelusa	174	1351	1545	1876			Williams2013	Bunter	280	331	426	328	344	297	303	484	501	318	237
Holloway2009	Bunter SS (Holloway)	1396	14200						Gorecki2015	Qingshankou	1290	3047	5291	7420			Elenius2018	Skade 1	650	500	2800	5000
Holloway2009	Utsira	600	1200						Thibeaur2014	Bunter	350	2230					Elenius2018	Skade 2	590	230	1200	2300
Elenius2018	Skade 1	650	11764.7						Thibeaur2014	MtSimon	1620	13300					Elenius2018	Utsira	1700	210	1300	2100
Elenius2018	Skade 2	590	5411.76						Thibeaur2014	BasalCambrian	3260	16200					Gorecki2015	UpperMinnelusa	174	742	1714.5	3774
Elenius2018	Utsira	1700	4941.18						Thibeaur2014	Rotliegend	70	330					Gorecki2015	Qingshankou	1290	1402	3267	17625
Gorecki2015	UpperMinnelusa	174	4090	10043	21638				Szulczeski2012 and Goodman2013	A	3328	10000	17000				Thibeaur2014	Bunter	350	16500
Gorecki2015	Qingshankou	1290	7362	45237	137895				Szulczeski2012 and Goodman2014	B	3324	88000	15000				Thibeaur2014	MtSimon	1620	18100
Thibeaur2014	Bunter	350	4200						Szulczeski2012 and Goodman2015	C	4156	18000	9000				Thibeaur2014	BasalCambrian	3260	25000
Thibeaur2014	MtSimon	1620	11000	150000					Szulczeski2012 and Goodman2016	D	2496	17000	6000				Thibeaur2014	Rotliegend	70	60
Thibeaur2014	BasalCambrian	3260	57000	193000					Szulczeski2012 and Goodman2017	E	1496	9000	3000
Thibeaur2014	Rotliegend	70	840						Szulczeski2012 and Goodman2018	F	1455	12000	2000
Szulczeski2012 and Goodman2013	A	3328	72000	55000	52000	95000			Szulczeski2012 and Goodman2019	G	2033.28	7000	8000
Szulczeski2012 and Goodman2014	B	3324	63000	48000	46000	84000			Szulczeski2012 and Goodman2020	H	748.8	14000	2000
Szulczeski2012 and Goodman2015	C	4156	56000	43000	41000	75000			Szulczeski2012 and Goodman2021	I	499.2	5000	4000
Szulczeski2012 and Goodman2016	D	2496	47000	36000	34000	63000			Szulczeski2012 and Goodman2022	J	8131.2	5000	5000
Szulczeski2012 and Goodman2017	E	1496	20000	15000	15000	27000			Szulczeski2012 and Goodman2023	K	416	4000	3000
Szulczeski2012 and Goodman2018	F	1455	20000	15000	14000	26000			Szulczeski2012 and Goodman2024	L	34.72	2000	100
Szulczeski2012 and Goodman2019	G	2033.28	21000	21000	15000	27000			Szulczeski2012 and Goodman2025	M	49.8	2000	300
Szulczeski2012 and Goodman2020	H	748.8	14000	11000	10000	19000
Szulczeski2012 and Goodman2021	I	499.2	8000	6000	6000	11000
Szulczeski2012 and Goodman2022	J	8131.2	8000	8000	6000	11000
Szulczeski2012 and Goodman2023	K	416	7000	5000	5000	9000
Szulczeski2012 and Goodman2024	L	34.72	1000	400	400	1000
Szulczeski2012 and Goodman2025	M	49.8	1000	1000	1000	1000
			sim
	Bunter (Agada2017)	6435	16000	3700

## Sheet: Fig1_Mt Simon data
Mt simon capacity ranges (GT)
Year	lower	upper	Notes	Ref
2008	27	109		National Energy Technology Laboratory. (2007). Carbon Sequestration Atlas of the United States and Canada.
2009	5	13		Birkholzer, J. T., & Zhou, Q. (2009). Basin-scale hydrogeologic impacts of CO2 storage: Capacity and regulatory implications. International Journal of Greenhouse Gas Control, 3(6), 745–756. https://doi.org/10.1016/j.ijggc.2009.07.002
2010	11	151		National Energy Technology Laboratory. (2010). Carbon Sequestration Atlas of the United States and Canada (Vol. Third Edit). https://doi.org/10.1017/CBO9781107415324.004
2011	23.68	355.242		Medina, C. R., Rupp, J. A., & Barnes, D. A. (2011). Effects of reduction in porosity and permeability with depth on storage capacity and injectivity in deep saline aquifers: A case study from the Mount Simon Sandstone aquifer. International Journal of Greenhouse Gas Control, 5(1), 146–156. https://doi.org/10.1016/j.ijggc.2010.03.001
2011	22	89	Not peer reviewed	Liu, F., Lu, P., Zhu, C., & Xiao, Y. (2011). Coupled reactive flow and transport modeling of CO2 sequestration in the Mt. Simon sandstone formation, Midwest U.S.A. In AAPG Annual Convention and Exhibition (Vol. April 10-1). Houston, Tx. https://doi.org/10.1016/j.ijggc.2010.08.008
2012	8.26304	18.1	lower is based on closed system estimate	Zhou, Q., & Birkholzer, J. T. (2011). On scale and magnitude of pressure build-up induced by large-scale geologic storage of CO2. Greenhous Gases Science and Technology, 1(1), 11–20. https://doi.org/10.1002/ghg3.001
2012	11	150		National Energy Technology Laboratory. (2012). Carbon Sequestration Atlas of the United States and Canada (Vol. Fourth Edi). https://doi.org/10.1017/CBO9781107415324.004
2013	62	130		U.S. Geological Survey Carbon Dioxide Storage Resources Assessment Team. (2013). National assessment of geologic carbon dioxide storage resources — Results: U.S. Geological Survey Circular 1386. Retrieved from https://pubs.usgs.gov/circ/1386/
2014	11	150		Thibeau, S., Bachu, S., Birkholzer, J., Holloway, S., Neele, F., & Zhou, Q. (2014). Using pressure and volumetric approaches to estimate CO2 storage capacity in deep saline aquifers. Energy Procedia, 63, 5294–5304. https://doi.org/10.1016/j.egypro.2014.11.560
2015	12	172		National Energy Technology Laboratory. (2015). Carbon Storage Atlas: Fifth Edition. Retrieved from http://www.netl.doe.gov/technologies/carbon_seq/FAQs/carboncapture1.html

## Sheet: Fig2_Total_sequestered
Data from Haszeldine et al, 2017				Updated based on data in table to right			Growth				2017	2018	2019	2020	2021	2022	2023	2024	2025
Year	Rate (MT/yr)	Cumulative (MT)		Year	Rate (MT/yr)	Cumulative (MT)				Name	MT/yr	MT/yr	MT/yr	MT/yr	MT/yr	MT/yr	MT/yr	MT/yr	MT/yr
1972	0.45	0.5		1972	0.45	0.5				Buraica	0.35	0.35	0.35	0.35	0.35	0.35	0.35	0.35	0.35	EOR
1973	0.45	0.9		1973	0.45	0.9	0			Zama	0.025	0.025	0.025	0.025	0.025	0.025	0.025	0.025	0.025	EOR
1974	0.45	1.4		1974	0.45	1.4	0			Boundary Dam	1	1	1	1	1	1	1	1	1	EOR and Storage
1975	0.45	1.8		1975	0.45	1.8	0			Husky Energy	0.08	0.08	0.08	0.08	0.08	0.08	0.08	0.08	0.08	EOR	Revised down based on GCCS accessed October 10
1976	0.45	2.3		1976	0.45	2.3	0			Quest	1	1	1	1	1	1	1	1	1	EOR
1977	0.45	2.7		1977	0.45	2.7	0			Jilil	0.35	0.6	0.6	0.6	0.6	0.6	0.6	0.6	0.6	EOR	Increase in rate based on GCCS accessed October 10
1978	0.45	3.2		1978	0.45	3.2	0			Karamay	0.1	0.1	0.1	0.1	0.1	0.1	0.1	0.1	0.1	EOR
1979	0.45	3.6		1979	0.45	3.6	0			Zhongyuan	0.11	0.11	0.11	0.11	0.11	0.11	0.11	0.11	0.11	EOR
1980	0.45	4.1		1980	0.45	4.1	0			Shengli	0.35	0.35	0.35	0.35	0.35	0.35	0.35	0.35	0.35	EOR
1981	0.45	4.5		1981	0.45	4.5	0			Tomokomai	0.05	0.05	0.05							St	0.05	https://www.japanccs.com/en/
1982	1.15	5.7		1982	1.15	5.7	1.55556			Pemex EOR	0.85	0.85	0.85	0.85	0.85	0.85	0.85	0.85	0.85
1983	1.15	6.8		1983	1.15	6.8	0			Sleipner	1	1	1	1	1	1	1	1	1	st
1984	1.15	8		1984	1.15	8	0			Snohvit	0.7	0.7	0.7	0.7	0.7	0.7	0.7	0.7	0.7	st
1985	1.15	9.1		1985	1.15	9.1	0			Uthmaniyah	0.8	0.8								eor	ended 2018
1986	5.15	14.3		1986	5.15	14.3	3.47826			Abu Dhabi Al Reyadh	0.8	0.8	0.8	0.8	0.8	0.8	0.8	0.8	0.8	eor
1987	5.15	19.4		1987	5.15	19.4	0			Terrel Natural	0.45	0.45	0.45	0.45	0.45	0.45	0.45	0.45	0.45	eor
1988	5.15	24.6		1988	5.15	24.6	0			Enid	0.7	0.7	0.7	0.7	0.7	0.7	0.7	0.7	0.7	eor
1989	5.15	29.7		1989	5.15	29.7	0			Shute Creek	7	7	7	7	7	7	7	7	7	eor
1990	5.15	34.9		1990	5.15	34.9	0			Val Verde	0.85	0.85	0.85	0.85	0.85	0.85	0.85	0.85	0.85	eor
1991	5.15	40		1991	5.15	40	0			Great Plains	3	3	3	3	3	3	3	3	3	eor
1992	5.15	45.2		1992	5.15	45.2	0			Oakdale	0.4	0.4	0.4	0.4	0.4	0.4	0.4	0.4	0.4	eor
1993	5.15	50.3		1993	5.15	50.3	0			Century	5	5	5	5	5	5	5	5	5	eor
1994	5.15	55.5		1994	5.15	55.5	0			Arkalon	0.145	0.145	0.145	0.145	0.145	0.145	0.145	0.145	0.145	eor
1995	5.5	61		1995	5.5	61	0.0679612			Bonanza	0.1	0.1	0.1	0.1	0.1	0.1	0.1	0.1	0.1	eor
1996	6.591	67.5		1996	6.591	67.5	0.198364			Air products	1	1	1	1	1	1	1	1	1	eor
1997	6.591	74.1		1997	6.591	74.1	0			Lost cabin	0.95	0.95	0.95	0.95	0.95	0.95	0.95	0.95	0.95	eor
1998	8.287	82.4		1998	8.287	82.4	0.257321			PCS	0.4	0.4	0.4	0.4	0.4	0.4	0.4	0.4	0.4	eor
1999	8.287	90.7		1999	8.287	90.7	0			Michigan	0.00017	0.00017								st
2000	11.29	102		2000	11.29	102	0.362375			Bell Creek	1.85	1.386	1.386	1.386	1.386	1.386	1.386	1.386	1.386	eor	1.38667	Drop this estimate based on Jin2017
2001	11.29	113.3		2001	11.29	113.3	0			Ramsey Gas	0.115	0.115	0.115	0.115	0.115	0.115	0.115	0.115	0.115	eor
2002	11.29	124.6		2002	11.29	124.6	0			Illinois	1	1	1	1	1	1	1	1	1	st
2003	11.29	135.9		2003	11.29	135.9	0			Petra Nova	1.4	1.4	1.4	1.4	1.4	1.4	1.4	1.4	1.4	eor	Revised down based on GCCS accessed October 10
2004	12.51	148.4		2004	12.51	148.4	0.10806			Changqing CTL	0.05	0.1	0.1	0.1	0.1	0.1	0.1	0.1	0.1	eor	Not on Haszeldine2017
2005	12.92	161.3		2005	12.92	161.3	0.0327738			Geothermal Plant Croatia		0.05	0.05	0.05	0.05	0.05	0.05	0.05	0.05	geo
2006	12.59	173.9		2006	12.59	173.9	-0.0255418			Gorgon Project Australia			1.41667	3.4	3.7	4	4	4	4	geo	Prorated from injection in Aug 2019 based on GCCS data accessed Oct 10, 2019
2007	13.04	186.9		2007	13.04	186.9	0.0357427			Sinopec Qilu Petrochemical				0.4	0.4	0.4	0.4	0.4	0.4	EOR
2008	13.75	200.7		2008	13.75	200.7	0.0544479			Alberta Carbon Trunk Line w Sturgeon Refinery Stream				1.2	1.3	1.4	1.4	1.4	1.4	EOR	Conservative estimate fromGCCS accessed on Oct 10th and information from https://actl.ca/actl-project/faqs/
2009	13.81	214.5		2009	13.81	214.5	0.00436364			Alberta Carbon Trunk Line w/Agrium Stream				0.3	0.4	0.5	0.6	0.6	0.6
2010	19.24	233.7		2010	19.24	233.7	0.393193			Yanchang Integrated CCS Demo					0.41	0.41	0.41	0.41	0.41	EOR	Based on GCCS accessed October 10, 2019
2011	22.59	256.3		2011	22.59	256.3	0.174116			Sinopec Eastern China CCS					0.5	0.5	0.5	0.5	0.5	EOR	Based on GCCS accessed October 10, 2019
2012	22.34	278.6		2012	22.34	278.6	-0.0110668			Port of Rotterdam						2	2	2	2	Storage	Conservative estimate fromGCCS accessed on Oct 10, 2019
2013	31.59	310.2		2013	31.59	310.2	0.414056			Acorn Pilot						0.2	0.2	0.2	0.2	Storage	Based on GCCS accessed October 10, 2019
2014	32.47	342.7		2014	32.47	342.7	0.0278569			Lake Charles Methanol							4.2	4.2	4.2	EOR	Based on GCCS accessed October 10, 2019
2015	34.24	376.9		2015	34.24	376.9	0.0545119			Huaneng GreenGen Phase 2							0.06	0.06	0.06		Based on GCCS accessed October 10, 2019
2016	30.86	407.8		2016	30.86	407.8	-0.098715			Huaneng GreenGen Phase 3								2	2		Based on GCCS accessed October 10, 2019
2017	34.25	442		2017	33.1126	440.913	0.0729937			Norway Full Chain CCS								0.8	0.8		Based on GCCS accessed October 10, 2019
				2018	31.8612	472.774	-0.0377927			Teesside Collective									0.8		Based on GCCS accessed October 10, 2019
				2019	32.4777	505.251	0.0193495			Huazhong									0.1		Based on GCCS accessed October 10, 2019
				2020	36.311	541.562	0.11803			Caledonia									3		Based on GCCS accessed October 10, 2019
				2021	37.721	579.283	0.0388312			Hydrogen 2 Magnum									2		Based on GCCS accessed October 10, 2019
				2022	40.421	619.704	0.0715782			South West Hub									2.5		Based on GCCS accessed October 10, 2019
				2023	44.781	664.485	0.107865			total	31.9752	31.8612	32.4777	36.311	37.721	40.421	44.781	47.581	55.981	0
				2024	47.581	712.066	0.0625265
				2025	55.981	768.047	0.176541			Fraction of current storage that is EOR			0.839377
							0.0861775			Fraction of current storage that is pilot projects			0.99846

## Sheet: IPCC_2d_scenarios
IAMC 1.5°C Scenario Explorer and Data hosted by IIASA.									doi: 10.5281/zenodo.3363345 | url: data.ene.iiasa.ac.at/iamc-1.5c-explorer
Model	Scenario	Region	Variable	Unit	2010	2020	2030	2040	2050	2060	2070	2080	2090	2100
AIM/CGE 2.0	ADVANCE_2020_Med2C	World	Carbon Sequestration|CCS	Mt CO2/yr	0	0	1084.16	6512.9	13708.9	17683.3	20072.7	21326.7	22946.3	25830.7
AIM/CGE 2.0	ADVANCE_2020_WB2C	World	Carbon Sequestration|CCS	Mt CO2/yr	0	0	954.968	5165	13317.3	17205.6	18167	20644.5	22514.8	22347.5
AIM/CGE 2.0	ADVANCE_2030_Price1.5C	World	Carbon Sequestration|CCS	Mt CO2/yr	0	0	414.018	2567.57	7455.99	13844.6	15388.4	16049.5	16081.6	20086.4
AIM/CGE 2.0	ADVANCE_2030_WB2C	World	Carbon Sequestration|CCS	Mt CO2/yr	0	0	435.715	2530.02	6835.18	12382.3	11965.2	14812.7	16433	15195.9
AIM/CGE 2.0	SSP1-26	World	Carbon Sequestration|CCS	Mt CO2/yr	0	0	0	1336.27	4553.8	7639.7	8715.87	9110.88	9117.67	9219.49
AIM/CGE 2.0	SSP2-26	World	Carbon Sequestration|CCS	Mt CO2/yr	0	0	1648.83	6617.76	15156	18482.2	19702.8	20608.2	21272.3	22286.9
AIM/CGE 2.0	SSP4-26	World	Carbon Sequestration|CCS	Mt CO2/yr	0	0	587.585	5483	12470.8	18040.7	20236.2	19918	19086.2	18279.3
AIM/CGE 2.0	SSP5-26	World	Carbon Sequestration|CCS	Mt CO2/yr	0	0	0	4765.12	17885.5	28892.1	32608.5	35245.2	38005.8	41348.8
AIM/CGE 2.1	CD-LINKS_NPi2020_1000	World	Carbon Sequestration|CCS	Mt CO2/yr	0	0	165.123	5486.52	12110.7	17196	20372.9	22123.5	23485.8	25642.1
AIM/CGE 2.1	EMF33_Med2C_cost100	World	Carbon Sequestration|CCS	Mt CO2/yr	0	0	630.986	5259.93	12192.5	17685.5	21715.3	23738.1	24949.8	26120
AIM/CGE 2.1	EMF33_Med2C_full	World	Carbon Sequestration|CCS	Mt CO2/yr	0	0	635.692	5543.39	12105.3	17326.4	22057.7	23371.4	24482.3	25406.8
AIM/CGE 2.1	EMF33_Med2C_nobeccs	World	Carbon Sequestration|CCS	Mt CO2/yr	0	0	629.588	4713.11	10942	14727	13556.2	15732.7	17641.9	19220.2
AIM/CGE 2.1	EMF33_Med2C_nofuel	World	Carbon Sequestration|CCS	Mt CO2/yr	0	0	767.266	5069.91	12665.3	16746	15180.4	17672.3	19959	21946.3
AIM/CGE 2.1	EMF33_Med2C_none	World	Carbon Sequestration|CCS	Mt CO2/yr	0	0	759.931	4989.11	12674.7	16856.2	14573.1	16920.5	19258.1	21349.8
AIM/CGE 2.1	EMF33_WB2C_full	World	Carbon Sequestration|CCS	Mt CO2/yr	0	0	635.692	4665.45	13801.1	21294.9	19648.8	22562.2	25714.1	28534.5
AIM/CGE 2.1	TERL_2D_LowCarbonTransportPolicy	World	Carbon Sequestration|CCS	Mt CO2/yr	0	0	807.345	5383.36	11145	17492.5	22252.4	25862.6	27101.6	25823.8
AIM/CGE 2.1	TERL_2D_NoTransportPolicy	World	Carbon Sequestration|CCS	Mt CO2/yr	0	0	920.201	5944.43	12812.6	19086.9	24045.5	25486.8	24764.7	21203.1
GCAM 4.2	SSP1-26	World	Carbon Sequestration|CCS	Mt CO2/yr	1813.32	2360.5	3368.03	4188.27	5118.54	6943.89	9416.93	12292.1	14457.4	16216.8
GCAM 4.2	SSP2-26	World	Carbon Sequestration|CCS	Mt CO2/yr	1813.32	2539.36	3488.42	11325.6	17059	20813.6	23464.2	24849.4	26751.4	32140
GCAM 4.2	SSP4-26	World	Carbon Sequestration|CCS	Mt CO2/yr	1813.32	2566.11	9776.83	15773.6	20062	23252.7	24568.9	24992.4	26883.7	31790.9
GCAM 4.2	SSP5-26	World	Carbon Sequestration|CCS	Mt CO2/yr	1813.32	2638.28	4086.31	20541.4	29957.6	34654.3	37637.3	37708.9	33732.1	33297.2
IMAGE 3.0.1	ADVANCE_2020_Med2C	World	Carbon Sequestration|CCS	Mt CO2/yr	0	40.079	1068.14	4199.85	8774.61	11061.7	13172.7	16812.9	20460.2	23445.9
IMAGE 3.0.1	ADVANCE_2020_WB2C	World	Carbon Sequestration|CCS	Mt CO2/yr	0	117.545	1180.62	6306.36	10180.3	12899.6	16472.8	19642	21362.3	21579.9
IMAGE 3.0.1	ADVANCE_2030_Med2C	World	Carbon Sequestration|CCS	Mt CO2/yr	0	52.6373	407.966	2163.23	5050.49	10948.3	14356.2	17388.9	21569.2	23490.2
IMAGE 3.0.1	ADVANCE_2030_WB2C	World	Carbon Sequestration|CCS	Mt CO2/yr	0	54.143	355.483	2849.53	9056.77	11539.7	13329.8	16088.5	20042.4	21029.4
IMAGE 3.0.1	CD-LINKS_NPi2020_1000	World	Carbon Sequestration|CCS	Mt CO2/yr	0	0	772.809	4911.5	9610.43	12185.4	15963.5	20343.2	21677.2	21604.3
IMAGE 3.0.1	CD-LINKS_NPi2020_1600	World	Carbon Sequestration|CCS	Mt CO2/yr	0	0	834.044	3939.84	8463.22	10421.7	13635.2	18500.7	20962.3	22924.3
IMAGE 3.0.1	SSP1-26	World	Carbon Sequestration|CCS	Mt CO2/yr	0	9.88881e-10	524.065	3298.17	5549.7	8620.2	11074	14819.5	17942.2	16210.2
IMAGE 3.0.1	SSP2-26	World	Carbon Sequestration|CCS	Mt CO2/yr	0	61.9246	1499.27	5862.12	8160.12	11001.2	14904.5	17387.9	19001.8	19232.4
IMAGE 3.0.1	SSP4-26	World	Carbon Sequestration|CCS	Mt CO2/yr	0	70.0093	1739.15	5998.05	6852.9	7677.81	9082.77	10189.2	9664.05	10278.2
IMAGE 3.0.2	EMF33_WB2C_cost100	World	Carbon Sequestration|CCS	Mt CO2/yr	0	19.2795	1349.66	5384.33	11401.2	13739.2	15897.5	18948.3	21333.3	22569.5
IMAGE 3.0.2	EMF33_WB2C_full	World	Carbon Sequestration|CCS	Mt CO2/yr	0	19.5152	1428.53	7452.47	10688.4	12744.5	15377.7	18584.1	20875.7	21939.2
IMAGE 3.0.2	EMF33_WB2C_limbio	World	Carbon Sequestration|CCS	Mt CO2/yr	0	51.5335	1566.71	7329.71	9533.51	10999.4	14556.9	16270.2	15761.8	15340.3
IMAGE 3.0.2	EMF33_WB2C_nobeccs	World	Carbon Sequestration|CCS	Mt CO2/yr	0	27.3691	1180.81	2508.41	5381.38	6242.52	8467.42	12006	12794.8	12700.2
IMAGE 3.0.2	EMF33_WB2C_nofuel	World	Carbon Sequestration|CCS	Mt CO2/yr	0	20.3668	1585.72	6412.41	10281.4	12776.9	15809.9	19530.9	21474.6	21862.4
IMAGE 3.0.2	EMF33_tax_hi_full	World	Carbon Sequestration|CCS	Mt CO2/yr	0	0	868.728	5483.35	9937.07	12179.1	14440.9	16764.5	20627.8	22850.4
MERGE-ETL 6.0	DAC2_66	World	Carbon Sequestration|CCS	Mt CO2/yr	0	0	121.1	2441.9	9384	12868.2	14557.8	15819.7	18187.6	21496
MESSAGE V.3	GEA_Eff_1p5C	World	Carbon Sequestration|CCS	Mt CO2/yr	0	791.098	2790.81	5231.77	6873	6705.97	6051.55	6963.04	8852.35	11101.4
MESSAGE V.3	GEA_Eff_1p5C_Delay2020	World	Carbon Sequestration|CCS	Mt CO2/yr	0	0	3252.04	9439.29	15832.7	13625.8	10836.9	10104.8	10730.4	11390.1
MESSAGE V.3	GEA_Eff_2C_Delay2020	World	Carbon Sequestration|CCS	Mt CO2/yr	0	0	1193.28	5577.22	13029.2	17264.3	17920.9	16243.3	15022.8	13653.3
MESSAGE V.3	GEA_Eff_AdvNCO2_1p5C	World	Carbon Sequestration|CCS	Mt CO2/yr	0	369.351	2046.9	5119.94	7589.72	8541.54	8498.86	9541.09	10706.7	11801.3
MESSAGE V.3	GEA_Mix_1p5C_AdvNCO2_PartialDelay2020	World	Carbon Sequestration|CCS	Mt CO2/yr	0	229.233	3765.1	11367.1	18608.6	14747.5	13308.7	13506.6	14660.6	15681
MESSAGE V.3	GEA_Mix_1p5C_AdvTrans_PartialDelay2020	World	Carbon Sequestration|CCS	Mt CO2/yr	0	229.233	3469.54	10483.7	18691.9	19404.4	17286.5	14596.4	13451.3	14088.4
MESSAGE V.3	GEA_Mix_2C_AdvNCO2_PartialDelay2020	World	Carbon Sequestration|CCS	Mt CO2/yr	0	229.134	2326.22	8831.97	20545.2	27196.3	28236.5	25692.9	22199.8	17570.1
MESSAGE V.3	GEA_Mix_2C_AdvTrans_PartialDelay2020	World	Carbon Sequestration|CCS	Mt CO2/yr	0	229.126	2251.5	8436.54	19911.9	26040.1	27830.8	25234.7	23491.4	20087.4
MESSAGE-GLOBIOM 1.0	ADVANCE_2020_Med2C	World	Carbon Sequestration|CCS	Mt CO2/yr	0	9.90733	1403.78	8027.06	21857.3	29922.4	38177.9	43530.3	44253.7	44252.9
MESSAGE-GLOBIOM 1.0	ADVANCE_2020_WB2C	World	Carbon Sequestration|CCS	Mt CO2/yr	0	9.90733	4561.84	13738.5	24627.3	30447	36690	37244.7	33496.2	31037.7
MESSAGE-GLOBIOM 1.0	ADVANCE_2030_Med2C	World	Carbon Sequestration|CCS	Mt CO2/yr	0	9.90733	1536.21	6072.6	15602.7	28120.8	34890.6	40405.4	40888.4	38366.1
MESSAGE-GLOBIOM 1.0	ADVANCE_2030_WB2C	World	Carbon Sequestration|CCS	Mt CO2/yr	0	9.90733	1537.1	7031.67	15188.6	22308.9	23787.1	24079.7	27236.9	27989.5
MESSAGE-GLOBIOM 1.0	EMF33_Med2C_cost100	World	Carbon Sequestration|CCS	Mt CO2/yr	0	0	872.342	3862.62	9447.6	16599.5	23296.4	26845.3	25502.3	22236.3
MESSAGE-GLOBIOM 1.0	EMF33_Med2C_full	World	Carbon Sequestration|CCS	Mt CO2/yr	0	0	744.713	3799.52	10616.2	18598.7	24249.5	27333.6	26189.2	22971.6
MESSAGE-GLOBIOM 1.0	EMF33_Med2C_limbio	World	Carbon Sequestration|CCS	Mt CO2/yr	0	0	1251.55	5280.28	12522.1	19228.5	24027.2	25060.7	21697.3	15552.1
MESSAGE-GLOBIOM 1.0	EMF33_Med2C_nobeccs	World	Carbon Sequestration|CCS	Mt CO2/yr	0	0	1901.81	6625.53	11522.9	14551	16381.7	13538.9	8732.05	4024.28
MESSAGE-GLOBIOM 1.0	EMF33_Med2C_nofuel	World	Carbon Sequestration|CCS	Mt CO2/yr	0	0	906.282	4133.83	11116.4	18257.5	21733.7	22883.4	20717.1	17474.2
MESSAGE-GLOBIOM 1.0	EMF33_Med2C_none	World	Carbon Sequestration|CCS	Mt CO2/yr	0	0	2526.36	8103.79	11858.3	14552.1	14932.7	10688.1	5167.95	2785.87
MESSAGE-GLOBIOM 1.0	EMF33_tax_hi_full	World	Carbon Sequestration|CCS	Mt CO2/yr	0	0	1609.73	6464.69	14268.3	20669	25245	25465.6	21999.3	17585
MESSAGE-GLOBIOM 1.0	EMF33_tax_hi_none	World	Carbon Sequestration|CCS	Mt CO2/yr	0	0	1500.55	5555.05	10643.1	13624.7	16653.1	15759.8	11186.6	5788.49
MESSAGE-GLOBIOM 1.0	SSP1-26	World	Carbon Sequestration|CCS	Mt CO2/yr	0	0	608.084	2901.38	7909.59	14259.8	19077.4	20955.4	20112.6	17274.1
MESSAGE-GLOBIOM 1.0	SSP2-26	World	Carbon Sequestration|CCS	Mt CO2/yr	0	14.7987	1149.26	4564.64	11005.5	16585.5	22888.7	24607.3	23031.1	20883.9
MESSAGEix-GLOBIOM 1.0	CD-LINKS_NPi2020_1000	World	Carbon Sequestration|CCS	Mt CO2/yr	0	0	1884.76	6850.22	14658	21424.2	25525.7	25323	22004.3	18836.5
MESSAGEix-GLOBIOM 1.0	CD-LINKS_NPi2020_1600	World	Carbon Sequestration|CCS	Mt CO2/yr	0	0	679.681	3289.21	8136.26	16681.7	24296	28058.9	28996.7	26531.5
POLES ADVANCE	ADVANCE_2020_Med2C	World	Carbon Sequestration|CCS	Mt CO2/yr	0.00795001	1.5309	495.676	4427.3	13996.3	21459.8	24477.5	28932.4	34951.8	38440.2
POLES ADVANCE	ADVANCE_2030_Med2C	World	Carbon Sequestration|CCS	Mt CO2/yr	0.00795001	1.5309	468.53	4666.43	15543.8	21716.2	24422.8	28544	33722	38024.7
POLES CD-LINKS	CD-LINKS_NPi2020_1000	World	Carbon Sequestration|CCS	Mt CO2/yr	1.91964e-05	3.04362	46.2122	1187.44	5855.97	11756.1	15856.6	19994.4	25493	31213.7
POLES CD-LINKS	CD-LINKS_NPi2020_1600	World	Carbon Sequestration|CCS	Mt CO2/yr	1.91964e-05	3.04362	35.1798	461.832	3595.43	10825.4	15821.6	21228	26882	32672
POLES EMF33	EMF33_Med2C_cost100	World	Carbon Sequestration|CCS	Mt CO2/yr	0.00842941	0.882426	280.341	2040.55	6855.11	12853	16707.1	18337.5	18322.8	18309.5
POLES EMF33	EMF33_Med2C_full	World	Carbon Sequestration|CCS	Mt CO2/yr	0.00842941	0.882202	260.8	2338.13	7366.14	13839.8	17632.5	19717.2	19902.3	20072
POLES EMF33	EMF33_Med2C_limbio	World	Carbon Sequestration|CCS	Mt CO2/yr	0.00842941	0.882201	367.498	2490.19	6806.72	10380	12280.8	12815.1	12672.2	12216.1
POLES EMF33	EMF33_Med2C_nobeccs	World	Carbon Sequestration|CCS	Mt CO2/yr	0.00842941	0.8822	363.378	1408.27	2517.52	3636.57	4221.02	4227.6	3913.51	3620.67
POLES EMF33	EMF33_Med2C_nofuel	World	Carbon Sequestration|CCS	Mt CO2/yr	0.00842941	0.882895	260.693	2224.21	6661.81	12402.6	15612.5	16904.2	16613	16606.7
POLES EMF33	EMF33_Med2C_none	World	Carbon Sequestration|CCS	Mt CO2/yr	0.00842941	0.882893	369.084	1405.44	2499.31	3553.99	4042.47	4006.36	3653.9	3331.4
POLES EMF33	EMF33_tax_hi_full	World	Carbon Sequestration|CCS	Mt CO2/yr	0.00266145	0.299159	135.931	1085.99	4053.72	11575.7	16837.1	19482.8	19077.7	18622.2
POLES EMF33	EMF33_tax_hi_none	World	Carbon Sequestration|CCS	Mt CO2/yr	0.00266145	0.29963	135.767	957.388	2374.92	4286.8	5304.75	5231.83	4452.6	3579.84
REMIND 1.5	EMC_Def_30$	World	Carbon Sequestration|CCS	Mt CO2/yr	0	53.654	1100.83	4513.92	9081.75	13445.1	15598	15567.4	16131.9	16877.7
REMIND 1.5	EMC_NucPO_30$	World	Carbon Sequestration|CCS	Mt CO2/yr	0	62.332	1356.43	5607.34	10095.9	13810.9	15710.1	15603.9	16063.6	16828.8
REMIND 1.5	EMC_lowEI_30$	World	Carbon Sequestration|CCS	Mt CO2/yr	0	44.612	908.245	3524.6	6889.15	11225.6	14272.5	15315.4	16260.4	16973.3
REMIND 1.7	ADVANCE_2020_Med2C	World	Carbon Sequestration|CCS	Mt CO2/yr	0	0.778	183.403	2160.45	5566.93	8787.26	11245.4	12492.5	13050	13686.1
REMIND 1.7	ADVANCE_2020_WB2C	World	Carbon Sequestration|CCS	Mt CO2/yr	0	0.778	592.028	3556.59	6757.46	10001.6	11967.2	12997.6	13645.5	14527.3
REMIND 1.7	ADVANCE_2030_WB2C	World	Carbon Sequestration|CCS	Mt CO2/yr	0	0.778	69.6164	2318.79	7049.56	11047.5	13018	14257.5	14900.2	15432.2
REMIND 1.7	CEMICS-2.0-CDR12	World	Carbon Sequestration|CCS	Mt CO2/yr	0	0	359.735	2360.26	5851.79	9612.93	11267.5	10966.1	10275.2	8770.14
REMIND 1.7	CEMICS-2.0-CDR20	World	Carbon Sequestration|CCS	Mt CO2/yr	0	0	246.156	1644.2	4495.87	9342.34	14853.1	16787	14672.5	11610.8
REMIND 1.7	CEMICS-2.0-CDR8	World	Carbon Sequestration|CCS	Mt CO2/yr	0	0	447.78	2644	5455.68	7042.26	7583.25	7105.16	6769.02	6474.27
REMIND-MAgPIE 1.5	SSP1-26	World	Carbon Sequestration|CCS	Mt CO2/yr	0	0.377	61.4	611	2600	5970	8840	10200	10700	11000
REMIND-MAgPIE 1.5	SSP2-26	World	Carbon Sequestration|CCS	Mt CO2/yr	0	2.49	163	1490	5080	9310	12100	14000	15100	15600
REMIND-MAgPIE 1.7-3.0	CD-LINKS_NPi2020_1000	World	Carbon Sequestration|CCS	Mt CO2/yr	0	2.184	456.148	3740.33	7053.55	10195.2	12082.3	12981.9	13684.3	14214.1
REMIND-MAgPIE 1.7-3.0	CD-LINKS_NPi2020_1600	World	Carbon Sequestration|CCS	Mt CO2/yr	0	2.184	196.253	1897.25	5465.91	8252.29	10477.8	11723	11938.4	12186.3
REMIND-MAgPIE 1.7-3.0	EMF33_Med2C_limbio	World	Carbon Sequestration|CCS	Mt CO2/yr	0	15.2442	447.907	3041.45	7852.23	11362.8	12695	11908.8	9769.7	7954.35
REMIND-MAgPIE 1.7-3.0	EMF33_Med2C_none	World	Carbon Sequestration|CCS	Mt CO2/yr	0	15.2442	461.879	2702.71	6256.8	8939.02	9748.41	8311.52	5302.63	2623.35
REMIND-MAgPIE 1.7-3.0	EMF33_WB2C_cost100	World	Carbon Sequestration|CCS	Mt CO2/yr	0	15.2442	322.675	1987.01	5482.32	10471.5	14375.2	15800.1	16035.1	16179.6
REMIND-MAgPIE 1.7-3.0	EMF33_WB2C_full	World	Carbon Sequestration|CCS	Mt CO2/yr	0	15.2442	377.033	2665.01	7833.19	12500.8	14768.5	15880.2	16029.8	16187
REMIND-MAgPIE 1.7-3.0	EMF33_WB2C_limbio	World	Carbon Sequestration|CCS	Mt CO2/yr	0	15.2442	1019.08	6909.04	11990	14055	14030.9	12229.3	9954.33	8439.02
REMIND-MAgPIE 1.7-3.0	EMF33_WB2C_nobeccs	World	Carbon Sequestration|CCS	Mt CO2/yr	0	15.2442	814.133	4487.7	8662.52	11875.3	12900.7	11054.2	7507.01	4099.81
REMIND-MAgPIE 1.7-3.0	EMF33_WB2C_nofuel	World	Carbon Sequestration|CCS	Mt CO2/yr	0	15.2442	377.113	2940.04	8881.53	13740.2	15661.6	16193	16178.6	16240.6
REMIND-MAgPIE 1.7-3.0	EMF33_WB2C_none	World	Carbon Sequestration|CCS	Mt CO2/yr	0	15.2442	473.616	1971.56	2445.29	2457.67	1931.56	1091.19	633.11	457.438
REMIND-MAgPIE 1.7-3.0	EMF33_tax_hi_full	World	Carbon Sequestration|CCS	Mt CO2/yr	0	0	255.025	2258.78	7040.87	11694.7	14375.9	15701.7	15939.9	16138.6
REMIND-MAgPIE 1.7-3.0	PEP_2C_full_NDC	World	Carbon Sequestration|CCS	Mt CO2/yr	0	1.695	101.319	2420.97	7407.22	11336.6	13474.5	14648.7	15261.1	15466.2
REMIND-MAgPIE 1.7-3.0	PEP_2C_full_eff	World	Carbon Sequestration|CCS	Mt CO2/yr	0	26.3855	527.176	3879.43	7685.38	10510.6	12464.8	13259.9	13818.8	14212.8
REMIND-MAgPIE 1.7-3.0	PEP_2C_full_goodpractice	World	Carbon Sequestration|CCS	Mt CO2/yr	0	10.2546	439.266	2869.84	7657.1	11235	13216.2	14228.6	14839.9	15134.7
REMIND-MAgPIE 1.7-3.0	PEP_2C_full_netzero	World	Carbon Sequestration|CCS	Mt CO2/yr	0	26.3855	974.659	3455.93	8108.04	11275.2	13025.8	13689.4	14173.4	14384.7
REMIND-MAgPIE 1.7-3.0	PEP_2C_red_NDC	World	Carbon Sequestration|CCS	Mt CO2/yr	0	1.695	101.319	3444.38	7843.69	7969.54	7855.97	7661.85	7179.05	7398.03
REMIND-MAgPIE 1.7-3.0	PEP_2C_red_eff	World	Carbon Sequestration|CCS	Mt CO2/yr	0	26.3855	578.185	4527.01	6862.12	7416.77	7592.97	7495.99	7262.41	7249.7
REMIND-MAgPIE 1.7-3.0	PEP_2C_red_goodpractice	World	Carbon Sequestration|CCS	Mt CO2/yr	0	10.2546	439.266	3290.62	7588.21	7796.31	7669.16	7523.08	7129.79	7296.01
REMIND-MAgPIE 1.7-3.0	PEP_2C_red_netzero	World	Carbon Sequestration|CCS	Mt CO2/yr	0	26.3855	974.659	3555.55	7503.56	7792.92	7654.83	7492.63	7116.17	7222.02
REMIND-MAgPIE 1.7-3.0	SMP_2C_Def	World	Carbon Sequestration|CCS	Mt CO2/yr	0	13.3942	503.315	3850.97	7915.67	11175.1	13360.6	14291.4	15042.7	15336.9
REMIND-MAgPIE 1.7-3.0	SMP_2C_early	World	Carbon Sequestration|CCS	Mt CO2/yr	0	89.2749	1601.01	5652.65	9543.46	11570.2	12419	12387.3	12232.3	12500.9
WITCH-GLOBIOM 3.1	SSP1-26	World	Carbon Sequestration|CCS	Mt CO2/yr	1.35806	418.784	2886.3	4858.15	7227.82	8366.66	10633.6	11430.5	11179.2	12975.2
WITCH-GLOBIOM 3.1	SSP2-26	World	Carbon Sequestration|CCS	Mt CO2/yr	1.35806	600.232	4233.3	6178.41	7611.41	10260.3	14476.6	19243.7	17506.4	15895
WITCH-GLOBIOM 3.1	SSP4-26	World	Carbon Sequestration|CCS	Mt CO2/yr	1.35806	350.669	3110.61	6468.75	10135.2	15333.3	16845.1	17681.8	16378.1	14846.7
WITCH-GLOBIOM 4.2	ADVANCE_2020_Med2C	World	Carbon Sequestration|CCS	Mt CO2/yr	0.124171	282.266	2056.72	4435.33	6934.81	10017.3	15897.5	20521.9	24082	24915.6
WITCH-GLOBIOM 4.2	ADVANCE_2020_WB2C	World	Carbon Sequestration|CCS	Mt CO2/yr	0.124171	282.266	2618.19	4697.34	7749.65	10829.5	15400.5	20578.4	24093.6	24757.7
WITCH-GLOBIOM 4.2	ADVANCE_2030_Med2C	World	Carbon Sequestration|CCS	Mt CO2/yr	0.124171	282.266	1672.1	4136.5	6464.09	9938.55	14479.6	19444.5	23322.6	24492.6
WITCH-GLOBIOM 4.2	ADVANCE_2030_Price1.5C	World	Carbon Sequestration|CCS	Mt CO2/yr	0.124171	282.266	1672.1	4434.11	6960.83	10152.3	14716.1	19262.8	22232.6	23542.1
WITCH-GLOBIOM 4.2	ADVANCE_2030_WB2C	World	Carbon Sequestration|CCS	Mt CO2/yr	0.124171	282.266	1672.1	4435.98	6797.59	9698.25	14150.4	19340.5	23247.7	24376.2
WITCH-GLOBIOM 4.4	CD-LINKS_NPi2020_1600	World	Carbon Sequestration|CCS	Mt CO2/yr	0.0588954	0.0676255	1327.77	4841.25	7537.05	10014.3	11874.1	12875.3	14329.5	15436.8
					2010	2020	2030	2040	2050	2060	2070	2080	2090	2100
				median	0	2.184	814.133	4435.98	8160.12	12283.9	14810.8	16517.3	17574.1	16925.5
				mean	63.1138	140.691	1187.78	4752.54	9748.23	13698.5	16124.5	17582.8	18064.3	18135.5
	median	mean	cumulative
2010	0	63.1138	0
2020	2.184	140.691	2.184
2030	814.133	1187.78	816.317
2040	4435.98	4752.54	5252.3	240390
2050	8160.12	9748.23	13412.4
2060	12283.9	13698.5	25696.3
2060	12283.9	13698.5	37980.1
2070	14810.8	16124.5	52790.9
2080	16517.3	17582.8	69308.3
2090	17574.1	18064.3	86882.4
2100	16925.5	18135.5	103808

## Sheet: IPCC_1_5d_scenarios
IAMC 1.5°C Scenario Explorer and Data hosted by IIASA.									doi: 10.5281/zenodo.3363345 | url: data.ene.iiasa.ac.at/iamc-1.5c-explorer
Model	Scenario	Region	Variable	Unit	2010	2020	2030	2040	2050	2060	2070	2080	2090	2100
AIM/CGE 2.0	ADVANCE_2020_1.5C-2100	World	Carbon Sequestration|CCS	Mt CO2/yr	0	0	1195.25	4587.62	10298.3	16052.1	18825.3	19233.8	18530	23571.8
AIM/CGE 2.0	SSP1-19	World	Carbon Sequestration|CCS	Mt CO2/yr	0	0	471.362	3097.84	6315.88	5725.81	5623.44	5305.13	5405.13	5253.5
AIM/CGE 2.0	SSP2-19	World	Carbon Sequestration|CCS	Mt CO2/yr	0	0	1999.27	5900.01	14644.8	14198.6	15403.6	15984.2	16699.1	17693.1
AIM/CGE 2.1	CD-LINKS_NPi2020_400	World	Carbon Sequestration|CCS	Mt CO2/yr	0	0	447.191	6191.35	13070.8	14163.8	16061.4	15730.9	15995.2	14764
AIM/CGE 2.1	EMF33_WB2C_cost100	World	Carbon Sequestration|CCS	Mt CO2/yr	0	0	630.986	4359.45	12622.5	19424.2	16158.7	18919.3	21839.6	24493.9
AIM/CGE 2.1	TERL_15D_LowCarbonTransportPolicy	World	Carbon Sequestration|CCS	Mt CO2/yr	0	0	752.109	4864.98	15883.7	23600.7	26489.3	27009.1	23499.2	18102.8
AIM/CGE 2.1	TERL_15D_NoTransportPolicy	World	Carbon Sequestration|CCS	Mt CO2/yr	0	0	852.369	4844.34	15958	23380.7	24633.2	22674.8	17021.6	10193.3
GCAM 4.2	SSP1-19	World	Carbon Sequestration|CCS	Mt CO2/yr	0	127.531	1346.43	2723.58	5024.73	7838.34	9554.06	10642.1	12009.8	14255
GCAM 4.2	SSP2-19	World	Carbon Sequestration|CCS	Mt CO2/yr	0	200.461	3157.43	12685.8	16862.3	18428.2	18634.2	19403.8	22996.9	29698.3
GCAM 4.2	SSP5-19	World	Carbon Sequestration|CCS	Mt CO2/yr	0	247.267	7628.8	22567.4	28322.4	30750.2	30500.2	27194.2	24632.2	25516.7
IMAGE 3.0.1	ADVANCE_2020_1.5C-2100	World	Carbon Sequestration|CCS	Mt CO2/yr	0	101.929	1471.08	11368.1	18153.8	20064.1	22363.1	25463.7	27392.6	28459.7
IMAGE 3.0.1	CD-LINKS_NPi2020_400	World	Carbon Sequestration|CCS	Mt CO2/yr	0	0	1396.78	10908	17539.1	19206.5	22577.7	25845.1	27835.5	28655.9
IMAGE 3.0.1	IMA15-AGInt	World	Carbon Sequestration|CCS	Mt CO2/yr	0	118.837	2157.64	6818.63	13189.4	16296.3	19630.9	21480.3	20952.3	24805.5
IMAGE 3.0.1	IMA15-Def	World	Carbon Sequestration|CCS	Mt CO2/yr	0	118.836	3931.65	15395.2	18608.9	20124.5	23019.5	25304.4	26071.2	27790.6
IMAGE 3.0.1	IMA15-Eff	World	Carbon Sequestration|CCS	Mt CO2/yr	0	103.042	2915.52	12935.3	16273.4	18049.1	21127.5	23354.4	24523.9	26582.7
IMAGE 3.0.1	IMA15-LiStCh	World	Carbon Sequestration|CCS	Mt CO2/yr	0	117.779	2110.61	6364.18	10269.3	13036.7	16738.7	19343	19758.2	21996.2
IMAGE 3.0.1	IMA15-LoNCO2	World	Carbon Sequestration|CCS	Mt CO2/yr	0	118.837	2157.62	6320.99	8102.68	9834.83	13750.2	16854.8	18113.8	19457.4
IMAGE 3.0.1	IMA15-Pop	World	Carbon Sequestration|CCS	Mt CO2/yr	0	114.49	2073.04	8195.55	14998.9	18252.6	20985.9	22475.5	22098.2	24539.6
IMAGE 3.0.1	IMA15-RenElec	World	Carbon Sequestration|CCS	Mt CO2/yr	0	110.528	2143.37	7461.11	13127.7	16726.8	19854	20533.8	20561	21236.6
IMAGE 3.0.1	IMA15-TOT	World	Carbon Sequestration|CCS	Mt CO2/yr	0	33.9608	1502.53	3169.74	3792.35	5151.07	7042.34	7042.13	6390.31	6441.6
IMAGE 3.0.1	SSP1-19	World	Carbon Sequestration|CCS	Mt CO2/yr	0	181.469	2510.51	8466.59	10766.6	12368.7	14600.1	15589.3	16076.1	17904.5
MERGE-ETL 6.0	DAC15_50	World	Carbon Sequestration|CCS	Mt CO2/yr	0	0	121.1	2851.7	10321.3	12961.1	15322.3	16993.5	20276	24610.7
MESSAGE-GLOBIOM 1.0	ADVANCE_2020_1.5C-2100	World	Carbon Sequestration|CCS	Mt CO2/yr	0	9.90733	5322.64	12998.7	18096.5	18214	21356.1	24687.4	25554.8	26131.6
MESSAGE-GLOBIOM 1.0	ADVANCE_2030_Price1.5C	World	Carbon Sequestration|CCS	Mt CO2/yr	0	9.90733	1537.08	7363.56	12829.7	16823.3	17875.5	21154.6	25020.1	25736.2
MESSAGE-GLOBIOM 1.0	EMF33_1.5C_cost100	World	Carbon Sequestration|CCS	Mt CO2/yr	0	0	4308.46	8754.14	11674.4	13412.1	12988.4	12469.1	13154.2	13702.2
MESSAGE-GLOBIOM 1.0	EMF33_1.5C_full	World	Carbon Sequestration|CCS	Mt CO2/yr	0	0	4192.73	8778.22	12062.1	13727.2	13140.9	12537.8	13185	13726.3
MESSAGE-GLOBIOM 1.0	EMF33_WB2C_cost100	World	Carbon Sequestration|CCS	Mt CO2/yr	0	0	2623.17	8557.7	14830	21565.7	23318.8	20997.2	16728.3	14603.8
MESSAGE-GLOBIOM 1.0	EMF33_WB2C_full	World	Carbon Sequestration|CCS	Mt CO2/yr	0	0	2548.53	8600.39	15389.5	22015.3	23981.3	21635.6	17250.6	14804.6
MESSAGE-GLOBIOM 1.0	EMF33_WB2C_limbio	World	Carbon Sequestration|CCS	Mt CO2/yr	0	0	3422.05	10257	15820.6	19703.6	16415.2	10976.3	7492.21	7145.24
MESSAGE-GLOBIOM 1.0	EMF33_WB2C_nofuel	World	Carbon Sequestration|CCS	Mt CO2/yr	0	0	2757.57	9029.58	15085.9	19784.2	19770	16859.3	14476.3	14353.9
MESSAGE-GLOBIOM 1.0	SSP1-19	World	Carbon Sequestration|CCS	Mt CO2/yr	0	0	1841.3	6770.43	14112.1	18652	19173.6	16893.2	14518	13991.9
MESSAGE-GLOBIOM 1.0	SSP2-19	World	Carbon Sequestration|CCS	Mt CO2/yr	0	0	1845.83	5694.96	8602.11	9090.27	10568.6	12510.2	12918.7	13607
MESSAGEix-GLOBIOM 1.0	CD-LINKS_NPi2020_400	World	Carbon Sequestration|CCS	Mt CO2/yr	0	0	3724.06	9928.51	14082.1	17141.3	15363.3	14763.3	15369.6	16719.4
MESSAGEix-GLOBIOM 1.0	LowEnergyDemand	World	Carbon Sequestration|CCS	Mt CO2/yr	0	0	0	0	0	0	0	0	0	0
POLES ADVANCE	ADVANCE_2020_1.5C-2100	World	Carbon Sequestration|CCS	Mt CO2/yr	0.00795001	1.53093	1416.47	6535.85	14996.4	20358.6	23145.1	27805.1	34939.8	35838.9
POLES ADVANCE	ADVANCE_2020_WB2C	World	Carbon Sequestration|CCS	Mt CO2/yr	0.00795001	1.5309	827.906	7537.66	18540.6	23295.3	26337	30227.3	35744.2	38020.1
POLES ADVANCE	ADVANCE_2030_1.5C-2100	World	Carbon Sequestration|CCS	Mt CO2/yr	0.00795001	1.5309	468.847	4245.76	12219.6	20818.5	22569.4	27761.7	35279.7	35766.5
POLES ADVANCE	ADVANCE_2030_Price1.5C	World	Carbon Sequestration|CCS	Mt CO2/yr	0.00795001	1.5309	468.53	4790.14	12919.4	20220.9	22635	27457.2	34379.7	33149.4
POLES ADVANCE	ADVANCE_2030_WB2C	World	Carbon Sequestration|CCS	Mt CO2/yr	0.00795001	1.5309	468.53	6977.74	16569.1	22905.8	25417.6	30294	35058.3	37681.9
POLES CD-LINKS	CD-LINKS_NPi2020_400	World	Carbon Sequestration|CCS	Mt CO2/yr	1.91964e-05	3.04362	78.1889	1551.22	6323.35	10049	13661	17916	23413.1	27086.1
POLES EMF33	EMF33_WB2C_cost100	World	Carbon Sequestration|CCS	Mt CO2/yr	0.00842941	0.882426	385.954	2432.08	7000.75	12896.2	16187.4	17637	17400.4	17120.1
POLES EMF33	EMF33_WB2C_full	World	Carbon Sequestration|CCS	Mt CO2/yr	0.00842941	0.8822	379.674	2575.68	7637.35	14006.3	17533	19117.4	18995.2	18824.4
POLES EMF33	EMF33_WB2C_limbio	World	Carbon Sequestration|CCS	Mt CO2/yr	0.00842941	0.8822	412.003	2105.25	5351.77	8099.1	9482.83	9932.68	9664.41	9590.1
POLES EMF33	EMF33_WB2C_nobeccs	World	Carbon Sequestration|CCS	Mt CO2/yr	0.00842941	0.8822	424.43	1091.29	1563.89	1778.12	1719.41	1588.66	1382.09	1238.17
POLES EMF33	EMF33_WB2C_nofuel	World	Carbon Sequestration|CCS	Mt CO2/yr	0.00842941	0.882893	384.6	2389.9	6507.9	11514.4	14256	15726.6	15398	14972.7
POLES EMF33	EMF33_WB2C_none	World	Carbon Sequestration|CCS	Mt CO2/yr	0.00842941	0.882893	424.266	1063.67	1472.61	1585.62	1481.33	1258.76	1029.84	875.81
REMIND 1.5	EMC_Def_100$	World	Carbon Sequestration|CCS	Mt CO2/yr	0	147.703	2658.75	9339.11	15316.9	16061.8	16464.1	16966	16980.8	16984.6
REMIND 1.5	EMC_LimSW_100$	World	Carbon Sequestration|CCS	Mt CO2/yr	0	198.402	3821.14	11083.7	16392.8	16862.7	16885.1	16967.5	16981.9	16984.4
REMIND 1.5	EMC_NucPO_100$	World	Carbon Sequestration|CCS	Mt CO2/yr	0	190.933	3585.7	10387.2	16191.7	16674.1	16669.2	16954.9	16980.2	16984
REMIND 1.5	EMC_lowEI_100$	World	Carbon Sequestration|CCS	Mt CO2/yr	0	138.846	2482.48	8961.03	15088	15993.4	16499.3	16971.2	16984.9	16986.4
REMIND 1.7	ADVANCE_2020_1.5C-2100	World	Carbon Sequestration|CCS	Mt CO2/yr	0	0.778	1591.2	5496.83	10113.8	12686.9	14151.8	14999.5	15437.2	16249.5
REMIND 1.7	ADVANCE_2030_1.5C-2100	World	Carbon Sequestration|CCS	Mt CO2/yr	0	0.778	69.6164	3497.45	11387.4	14836.2	16196.9	16365.8	16421.5	16481.8
REMIND 1.7	ADVANCE_2030_Price1.5C	World	Carbon Sequestration|CCS	Mt CO2/yr	0	0.778	69.6164	2773.76	8750.49	12434	14045.5	14982.4	15481	16251.9
REMIND 1.7	CEMICS-1.5-CDR12	World	Carbon Sequestration|CCS	Mt CO2/yr	0	0	849.078	4398.69	7102.45	8190.1	8713.34	8377.72	7363.38	6069.68
REMIND 1.7	CEMICS-1.5-CDR20	World	Carbon Sequestration|CCS	Mt CO2/yr	0	0	524.806	3429.83	8574.53	13526.8	15404.5	13826	10889	7990.27
REMIND 1.7	CEMICS-1.5-CDR8	World	Carbon Sequestration|CCS	Mt CO2/yr	0	0	1112.95	4330.89	5373.05	5990.41	5762.65	5408.3	5440.26	4602.75
REMIND-MAgPIE 1.5	SSP1-19	World	Carbon Sequestration|CCS	Mt CO2/yr	0	0.377	435	3840	9400	11000	11400	11700	12000	12100
REMIND-MAgPIE 1.5	SSP2-19	World	Carbon Sequestration|CCS	Mt CO2/yr	0	2.49	1020	8130	12800	14100	14800	15400	15700	15900
REMIND-MAgPIE 1.5	SSP5-19	World	Carbon Sequestration|CCS	Mt CO2/yr	0	0.702	694	7170	16800	19900	21000	21700	22200	22500
REMIND-MAgPIE 1.7-3.0	CD-LINKS_NPi2020_400	World	Carbon Sequestration|CCS	Mt CO2/yr	0	2.184	1493.03	5171.41	9536.16	12357.9	13884.2	14525.3	15008.5	15958.7
REMIND-MAgPIE 1.7-3.0	EMF33_1.5C_cost100	World	Carbon Sequestration|CCS	Mt CO2/yr	0	15.2442	547.955	3926.69	10761.1	14911.5	15865.9	16129.1	16205.1	16284.5
REMIND-MAgPIE 1.7-3.0	EMF33_1.5C_full	World	Carbon Sequestration|CCS	Mt CO2/yr	0	15.2442	796.086	5927.42	12829.6	15288.4	15863.5	16121.7	16219	16286.2
REMIND-MAgPIE 1.7-3.0	EMF33_1.5C_nofuel	World	Carbon Sequestration|CCS	Mt CO2/yr	0	15.2442	1036.46	8383.82	14705.1	15973.1	16187.7	16191.7	16240.8	16289.8
REMIND-MAgPIE 1.7-3.0	PEP_1p5C_full_NDC	World	Carbon Sequestration|CCS	Mt CO2/yr	0	1.695	101.319	3764.48	11798.5	15089.1	16169.7	16392.3	16402.8	16470.4
REMIND-MAgPIE 1.7-3.0	PEP_1p5C_full_eff	World	Carbon Sequestration|CCS	Mt CO2/yr	0	26.3855	760.906	5900.51	10444	12975.8	14354.8	14887.7	15243.8	16081.3
REMIND-MAgPIE 1.7-3.0	PEP_1p5C_full_goodpractice	World	Carbon Sequestration|CCS	Mt CO2/yr	0	10.2546	439.266	3700.88	11313.2	14698	15941.1	16125.7	16190.5	16245.7
REMIND-MAgPIE 1.7-3.0	PEP_1p5C_full_netzero	World	Carbon Sequestration|CCS	Mt CO2/yr	0	26.3855	974.659	4048.18	11052	14337.5	15723.1	16006	16023	16163
REMIND-MAgPIE 1.7-3.0	PEP_1p5C_red_eff	World	Carbon Sequestration|CCS	Mt CO2/yr	0	26.3855	2970.91	7854.07	8145.83	8123.79	7985.01	7678.15	7843.05	7299.72
REMIND-MAgPIE 1.7-3.0	SMP_1p5C_Def	World	Carbon Sequestration|CCS	Mt CO2/yr	0	26.4935	1050.16	5917.56	10422.7	12896.6	14404	15142	15257.4	15646.9
REMIND-MAgPIE 1.7-3.0	SMP_1p5C_lifesty	World	Carbon Sequestration|CCS	Mt CO2/yr	0	17.8387	569.449	4856.98	8638.6	11081	12124.9	12093.7	11991.5	12295.6
REMIND-MAgPIE 1.7-3.0	SMP_1p5C_regul	World	Carbon Sequestration|CCS	Mt CO2/yr	0	91.4595	1594.56	5093.32	7329.81	8278.86	8608.67	8703.18	8763.02	8824.65
REMIND-MAgPIE 1.7-3.0	SMP_2C_Sust	World	Carbon Sequestration|CCS	Mt CO2/yr	0	15.1697	446.958	3771.42	5406.3	6467.4	7011.75	6914.04	6724.97	6685.27
REMIND-MAgPIE 1.7-3.0	SMP_2C_lifesty	World	Carbon Sequestration|CCS	Mt CO2/yr	0	7.3995	232.814	2258.21	6014.15	8595.19	10279.2	10977.7	11228.7	11386.6
REMIND-MAgPIE 1.7-3.0	SMP_2C_regul	World	Carbon Sequestration|CCS	Mt CO2/yr	0	11.9224	459.434	4061.07	6206.97	7411.03	8057.81	8457.63	8652.24	8674.77
WITCH-GLOBIOM 3.1	SSP1-19	World	Carbon Sequestration|CCS	Mt CO2/yr	1.35806	120.086	2320.88	4490	7351.52	10444.6	13832.2	18452.7	20378.7	20253.6
WITCH-GLOBIOM 3.1	SSP4-19	World	Carbon Sequestration|CCS	Mt CO2/yr	1.35806	123.849	2421.26	4697.57	7542.18	10515.7	13802.7	18385.9	20767.5	23091.3
WITCH-GLOBIOM 4.2	ADVANCE_2020_1.5C-2100	World	Carbon Sequestration|CCS	Mt CO2/yr	0.124171	282.266	2570.34	4858.29	7985.22	10843.5	14680	19381.5	22888.2	23617.2
WITCH-GLOBIOM 4.4	CD-LINKS_NPi2020_1000	World	Carbon Sequestration|CCS	Mt CO2/yr	0.0588954	0.0676255	2485.53	5198.63	7182.85	9214.08	11319.3	11816.8	13349.1	16080.1
